# Supplementary material
Source: publisher figshare collection journal article supplement (https://tandf.figshare.com/articles/dataset/_/6941363)
Supplement: Supplementary file 1 [file 1]

**Supplementary Table 1. Primer sequences for real-time RT-PCR.**

| Gene         | Forward primer sequence (5' to 3') | Reverse primer sequence (5' to 3') |
|--------------|------------------------------------|------------------------------------|
| <i>Acaca</i> | TGCAGGTATCCCCACTCTTC               | TTCTGATTCCCTTCCCTCCT               |
| <i>Fasn</i>  | GGAGGTGGTGATAGCCGGTAT              | TGGGTAATCCATAGAGCCCAG              |
| <i>Lep</i>   | GAGACCCCTGTGTCGGTTC                | CTGCGTGTGTGAAATGTCATTG             |
| <i>Rn18s</i> | GTAACCCGTTGAACCCCAT                | CCATCCAATCGGTAGTAGCG               |
| <i>Scd1</i>  | GAGGAACATCATTCTCATGGTCC            | CGTACACGTCATTCTGGAACG              |
